# Supplementary material
Source: PubMed Central journal article supplement (PMC4329047)
Supplement: NIHMS649323-supplement-Supp_Material.pdf [file NIHMS649323-supplement-Supp_Material.pdf]

1 **Supporting Information for:**

2

3

4

5 ***Enterococcus faecalis* pCF10-encoded Surface Proteins PrgA, PrgB (Aggregation Substance), and**

6 **PrgC Contribute to Plasmid Transfer, Biofilm Formation, and Virulence**

7

8 Minny Bhatti, Fernando Andrade, Melissa R. Cruz, Kristi L. Frank, Jenny A. Laverde Gomez, Danielle

9

A. Garsin, Gary M. Dunny, Heidi B. Kaplan, and Peter J. Christie

10

11

1 **Supplementary Table. Bacterial strains, plasmids and oligonucleotides used in this study.**

2

| Strains or plasmids               | Relevant features                                                                                                                                            | Source or Reference                 |
|-----------------------------------|--------------------------------------------------------------------------------------------------------------------------------------------------------------|-------------------------------------|
| <b>Strains</b>                    |                                                                                                                                                              |                                     |
| <i>E. coli</i>                    |                                                                                                                                                              |                                     |
| DH5 $\alpha$                      | F- $\phi$ 80dlacZ $\Delta$ M15 $\Delta$ (lacZYA-argF)U169 deoR recA1 endA1hsdR17(rK-mK+)phoA supE44 $\lambda$ - thi-1gyrA96 relA1                            | Gibco-BRL                           |
| BL21 (DE3)                        | F- ompT hsdSB (rB-mB-) gal dcm (DE3)                                                                                                                         | Novagen                             |
| EC1000                            | <i>E. coli</i> cloning host, provides RepA in trans                                                                                                          | (Leenhouts <i>et al.</i> , 1996)    |
| <i>E. faecalis</i>                |                                                                                                                                                              |                                     |
| OG1RF                             | Rif <sup>r</sup> Fus <sup>r</sup>                                                                                                                            | (Dunny <i>et al.</i> , 1978)        |
| OG1ES                             | Ery <sup>r</sup> Str <sup>r</sup>                                                                                                                            | (Staddon <i>et al.</i> , 2006)      |
| OG1SSp                            | Str <sup>r</sup> Spc <sup>r</sup>                                                                                                                            | (Dunny <i>et al.</i> , 1978)        |
| TX5536                            | Rif <sup>r</sup> Fus <sup>r</sup> , OG1RF deleted of <i>srtA</i>                                                                                             | (Kemp <i>et al.</i> , 2007)         |
| TX5470                            | Rif <sup>r</sup> Fus <sup>r</sup> , OG1RF deleted of <i>bps</i>                                                                                              | (Kemp <i>et al.</i> , 2007)         |
| TX5537                            | Rif <sup>r</sup> Fus <sup>r</sup> , OG1RF deleted of <i>srtA</i> and <i>bps</i>                                                                              | (Kemp <i>et al.</i> , 2007)         |
| TX5608                            | Rif <sup>r</sup> Fus <sup>r</sup> , OG1RF deleted of <i>ebpABC</i>                                                                                           | (Nallapareddy <i>et al.</i> , 2006) |
| TX5266                            | Rif <sup>r</sup> Fus <sup>r</sup> , OG1RF deleted of <i>fsrB</i>                                                                                             | (Qin <i>et al.</i> , 2001)          |
| TX5467                            | Rif <sup>r</sup> Fus <sup>r</sup> , Cm <sup>r</sup> , OG1RF $\Delta$ ace::cat                                                                                | (Singh <i>et al.</i> , 2010)        |
| TX5264                            | Rif <sup>r</sup> Fus <sup>r</sup> , OG1RF deleted of <i>gel</i> ; Gel <sup>-</sup> Spr <sup>+</sup>                                                          | (Sifri <i>et al.</i> , 2002)        |
| TX5243                            | Rif <sup>r</sup> Fus <sup>r</sup> , Kan <sup>r</sup> , OG1RF <i>sprE</i> insertional mutant; Gel <sup>+</sup> Spr <sup>-</sup>                               | (Qin <i>et al.</i> , 2000)          |
| TX5128                            | Rif <sup>r</sup> Fus <sup>r</sup> , Kan <sup>r</sup> , OG1RF <i>gelE</i> transposon mini- $\gamma\delta$ insertion mutant; Gel <sup>-</sup> Spr <sup>-</sup> | (Singh <i>et al.</i> , 1998)        |
| <b>Plasmids</b>                   |                                                                                                                                                              |                                     |
| pCJK47                            | Spc <sup>r</sup> , carries <i>oriT</i> <sub>pCF10</sub> , <i>lacZ</i> , and P-pheS* cassette                                                                 | (Kristich <i>et al.</i> , 2007)     |
| pDLP278p23                        | Spc <sup>r</sup> , pDL278 with <i>L. lactis</i> constitutive promoter P <sub>23</sub>                                                                        | (Chen <i>et al.</i> , 2007)         |
| pCIE                              | Cm <sup>r</sup> , cCF10 inducible P <sub>Q</sub> expression vector                                                                                           | Dunny Lab                           |
| pET28b(+)                         | Kan <sup>r</sup> , expression vector for His tagging                                                                                                         | Novagen                             |
| pCF10                             | Tet <sup>r</sup> , pheromone inducible conjugative plasmid                                                                                                   | (Dunny <i>et al.</i> , 1981)        |
| pCF10 $\Delta$ oriT               | pCF10 with a 54-bp deletion within <i>oriT</i>                                                                                                               | (Staddon <i>et al.</i> , 2006)      |
| pCF10 $\Delta$ prgA               | pCF10 deleted of <i>prgA</i>                                                                                                                                 | This study                          |
| pCF10 $\Delta$ oriT $\Delta$ prgA | pCF10 deleted of <i>oriT</i> and <i>prgA</i>                                                                                                                 | This study                          |

|                                        |                                                                                                                           |                                      |
|----------------------------------------|---------------------------------------------------------------------------------------------------------------------------|--------------------------------------|
| pCF10-8, designated here as pCF10ΔprgB | Tet <sup>r</sup> , pCF10 deleted of <i>prgB</i>                                                                           | (Chuang-Smith <i>et al.</i> , 2010)  |
| pCF10ΔprgC                             | Tet <sup>r</sup> , pCF10 deleted of <i>prgC</i>                                                                           | This study                           |
| pCF10ΔoriTΔprgC                        | Tet <sup>r</sup> , pCF10 deleted of <i>oriT</i> and <i>prgC</i>                                                           | This study                           |
| pCF10ΔprgA-C                           | Tet <sup>r</sup> , pCF10 deleted of <i>prgA</i> , <i>prgB</i> , <i>prgU</i> and <i>prgC</i>                               | This study                           |
| pCF10ΔprgK                             | Tet <sup>r</sup> , pCF10 deleted of <i>prgK</i>                                                                           | (Laverde Gomez <i>et al.</i> , 2014) |
| pCF10ΔprgJ                             | Tet <sup>r</sup> , pCF10 deleted of <i>prgJ</i>                                                                           | (Li <i>et al.</i> , 2012)            |
| pCF10ΔpcfC                             | Tet <sup>r</sup> , pCF10 deleted of <i>pcfC</i>                                                                           | (Chen <i>et al.</i> , 2008)          |
| pMCM1                                  | Spc <sup>r</sup> , pCJK47 with <i>prgA</i> flanking regions for construction of pCF10 Δ <i>prgA</i>                       | This study                           |
| pMCM2                                  | Spc <sup>r</sup> , pCJK47 with <i>prgC</i> flanking regions for construction of pCF10Δ <i>prgC</i>                        | This study                           |
| pMB1                                   | Spc <sup>r</sup> , pCJK47 with <i>prgA</i> and <i>prgC</i> flanking regions for construction of pCF10 Δ <i>prgABUC</i>    | This study                           |
| pMB2                                   | Spc <sup>r</sup> , pDL278p23 expressing P <sub>23</sub> - <i>prgA</i>                                                     | This study                           |
| pMB3                                   | Spc <sup>r</sup> , pDL278p23 expressing P <sub>23</sub> - <i>prgB</i>                                                     | This study                           |
| pMB4                                   | Spc <sup>r</sup> , pDL278p23 expressing P <sub>23</sub> - <i>prgC</i>                                                     | This study                           |
| pMB5                                   | Cm <sup>r</sup> , cCF10 inducible pCIE expressing <i>prgA</i>                                                             | This study                           |
| pMB6                                   | Cm <sup>r</sup> , cCF10 inducible pCIE expressing <i>prgB</i>                                                             | This study                           |
| pMB7                                   | Cm <sup>r</sup> , cCF10 inducible pCIE expressing <i>prgC</i>                                                             | This study                           |
| pINY1801                               | Cm <sup>r</sup> , fragment of pCF10 cloned in shuttle vector pWM401 confers constitute expression of PrgA, PrgB, and PrgC | (Christie <i>et al.</i> , 1988)      |
| <b>Primer name</b>                     | <b>Sequence (5' to 3')</b>                                                                                                | <b>Used for</b>                      |
| F- prgA up-XbaI                        | gctctagaatttcgtgcgatgatcttttg                                                                                             | pMCM1                                |
| R- prgA up-XmaI                        | aattattaacccccgggtttatttctcacttccg                                                                                        | pMCM1                                |
| F- prgA down-XmaI                      | gaaataaacccccggggttaataattgtttgatatagc                                                                                    | pMCM1                                |
| R- prgA down-NcoI                      | catgccatggctccgctaagttgctgtt                                                                                              | pMCM1                                |
| F- prgC up-XbaI                        | gctctagagcaccagtagagccatta                                                                                                | pMCM2                                |
| R- prgC up-XmaI                        | ctgattaagctccccgggtaatttctcceaata                                                                                         | pMCM2                                |
| F- prgC down-XmaI                      | gaggaaattacccccgggagcttaacagaaaagagt                                                                                      | pMCM2                                |
| R- prgC down-NcoI                      | catgccatggaaccaaatacgcacactg                                                                                              | pMCM2                                |
| F-RBS prgA-BamHI                       | cgcgatccttaaaggaggtattatagaaaaagattgcaagt                                                                                 | pMB2, pMB5                           |
| R-prgA- SphI                           | acatgcatgcttaactatttttttacg                                                                                               | pMB2, pMB5                           |

|                   |                                                    |                                   |
|-------------------|----------------------------------------------------|-----------------------------------|
| F-RBS prgB- BamHI | cgcgatccttaaaggaggattatatgaatcaacagactgaag         | pMB3, pMB6                        |
| R-prgB-SphI       | acatgcatgcttattttgttcttttctacg                     | pMB3, pMB6                        |
| F-RBS prgC- Sall  | acgcgctgacttaaaggaggattatatgaaaaaattattttatc<br>aa | pMB4, pMB7                        |
| R-prgC-SphI       | acatgcatgcttaagctttttcttattc                       | pMB4, pMB7                        |
| gyrB forward      | caagccaaaacaggtcgcc                                | (Bourgogne <i>et al.</i> , 2007)  |
| gyrB reverse      | accaacaccgtgcaagcc                                 | (Bourgogne <i>et al.</i> , 2007)  |
| QL forward        | catgtatatgtccccgctttt                              | (Chatterjee <i>et al.</i> , 2013) |
| QL reverse        | cggtcttacgagtagttcca                               | (Chatterjee <i>et al.</i> , 2013) |
| prgD-F RT         | cgaagagaataggccgttca                               | This work                         |
| prgD-R RT         | gacgcacctgtaaaaacacc                               | This work                         |
| prgJ-F RT         | acccaatgactggcttagag                               | This work                         |
| prjJ-R RT         | tagacgttagccctgatacgg                              | This work                         |
| pcfC-F RT         | gcgcttattggaggagacgag                              | (Chatterjee <i>et al.</i> , 2013) |
| pcfC-R RT         | cggcggccacgtataccac                                | (Chatterjee <i>et al.</i> , 2013) |
| pcfG-F RT         | ggcaacgccgttttagcac                                | (Chatterjee <i>et al.</i> , 2013) |
| pcfG-R RT         | ccatcaccgtgtgtacc                                  | (Chatterjee <i>et al.</i> , 2013) |

1  
2  
3  
4

## Supplementary References

- Bourgogne, A., Singh, K.V., Fox, K.A., Pflughoeft, K.J., Murray, B.E., and Garsin, D.A. (2007) EbpR is important for biofilm formation by activating expression of the endocarditis and biofilm-associated pilus operon (*ebpABC*) of *Enterococcus faecalis* OG1RF. *J Bacteriol* **189**: 6490-6493.
- Chandler, J.R., Flynn, A.R., Bryan, E.M., and Dunny, G.M. (2005) Specific control of endogenous cCF10 pheromone by a conserved domain of the pCF10-encoded regulatory protein PrgY in *Enterococcus faecalis*. *J Bacteriol* **187**: 4830-4843.
- Chatterjee, A., Cook, L.C., Shu, C.C., Chen, Y., Manias, D.A., Ramkrishna, D., *et al.* (2013) Antagonistic self-sensing and mate-sensing signaling controls antibiotic-resistance transfer. *Proc Natl Acad Sci U S A* **110**: 7086-7090.
- Chen, Y., Staddon, J.H., and Dunny, G.M. (2007) Specificity determinants of conjugative DNA processing in the *Enterococcus faecalis* plasmid pCF10 and the *Lactococcus lactis* plasmid pRS01. *Mol Microbiol* **63**: 1549-1564.
- Chen, Y., Zhang, X., Manias, D., Yeo, H.J., Dunny, G.M., and Christie, P.J. (2008) *Enterococcus faecalis* PcfC, a spatially localized substrate receptor for type IV secretion of the pCF10 transfer intermediate. *J Bacteriol* **190**: 3632-3645.
- Christie, P.J., Kao, S.M., Adsit, J.C., and Dunny, G.M. (1988) Cloning and expression of genes encoding pheromone-inducible antigens of *Enterococcus (Streptococcus) faecalis*. *J Bacteriol* **170**: 5161-5168.
- Chuang-Smith, O.N., Wells, C.L., Henry-Stanley, M.J., and Dunny, G.M. (2010) Acceleration of *Enterococcus faecalis* biofilm formation by aggregation substance expression in an *ex vivo* model of cardiac valve colonization. *PLoS ONE* **5**: e15798.
- Dunny, G., Funk, C. and Adsit, J. (1981) Direct stimulation of the transfer of antibiotic resistance by sex pheromones in *Streptococcus faecalis*. *Plasmid* **6**: 270-278.
- Dunny, G.M., Brown, B.L., and Clewell, D.B. (1978) Induced cell aggregation and mating in *Streptococcus faecalis*: evidence for a bacterial sex pheromone. *Proc Natl Acad Sci U S A* **75**: 3479-3483.
- Kemp, K.D., Singh, K.V., Nallapareddy, S.R., and Murray, B.E. (2007) Relative contributions of *Enterococcus faecalis* OG1RF sortase-encoding genes, *srtA* and *bps (srtC)*, to biofilm formation and a murine model of urinary tract infection. *Infect Immun* **75**: 5399-5404.
- Kristich, C.J., Chandler, J.R., and Dunny, G.M. (2007) Development of a host-genotype-independent counterselectable marker and a high-frequency conjugative delivery system and their use in genetic analysis of *Enterococcus faecalis*. *Plasmid* **57**: 131-144.
- Laverde Gomez, J.A., Bhatti, M., and Christie, P.J. (2014) PrgK, a multidomain peptidoglycan hydrolase, is essential for conjugative transfer of the pheromone-responsive plasmid pCF10. *J Bacteriol* **196**: 527-539.
- Leenhouts, K., Buist, G., Bolhuis, A., ten Berge, A., Kiel, J., Mierau, I., *et al.* (1996) A general system for generating unlabelled gene replacements in bacterial chromosomes. *Mol Gen Genet* **253**: 217-224.
- Li, F., Alvarez-Martinez, C., Chen, Y., Choi, K.J., Yeo, H.J., and Christie, P.J. (2012) *Enterococcus faecalis* PrgJ, a VirB4-like ATPase, mediates pCF10 conjugative transfer through substrate binding. *J Bacteriol* **194**:4041-4051.
- Nallapareddy, S.R., Singh, K.V., Sillanpaa, J., Garsin, D.A., Hook, M., Erlandsen, S.L., and Murray, B.E. (2006) Endocarditis and biofilm-associated pili of *Enterococcus faecalis*. *J Clin Invest* **116**: 2799-2807.
- Qin, X., Singh, K.V., Weinstock, G.M., and Murray, B.E. (2000) Effects of *Enterococcus faecalis* *fsr* genes on production of gelatinase and a serine protease and virulence. *Infect Immun* **68**: 2579-2586.
- Qin, X., Singh, K.V., Weinstock, G.M., and Murray, B.E. (2001) Characterization of *fsr*, a regulator controlling expression of gelatinase and serine protease in *Enterococcus faecalis* OG1RF. *J Bacteriol* **183**: 3372-3382.

1 Sifri, C.D., Mylonakis, E., Singh, K.V., Qin, X., Garsin, D.A., Murray, B.E., *et al.* (2002) Virulence  
2 effect of *Enterococcus faecalis* protease genes and the quorum-sensing locus *fsr* in  
3 *Caenorhabditis elegans* and mice. *Infect Immun* **70**: 5647-5650.  
4 Singh, K.V., Nallapareddy, S.R., Sillanpaa, J., and Murray, B.E. (2010) Importance of the collagen  
5 adhesin Ace in pathogenesis and protection against *Enterococcus faecalis* experimental  
6 endocarditis. *PLoS Pathog* **6**: e1000716.  
7 Singh, K.V., Qin, X., Weinstock, G.M., and Murray, B.E. (1998) Generation and testing of mutants of  
8 *Enterococcus faecalis* in a mouse peritonitis model. *J Infect Dis* **178**: 1416-1420.  
9 Staddon, J.H., Bryan, E.M., Manias, D.A., Chen, Y., and Dunny, G.M. (2006) Genetic characterization  
10 of the conjugative DNA processing system of enterococcal plasmid pCF10. *Plasmid* **56**: 102-111.  
11  
12

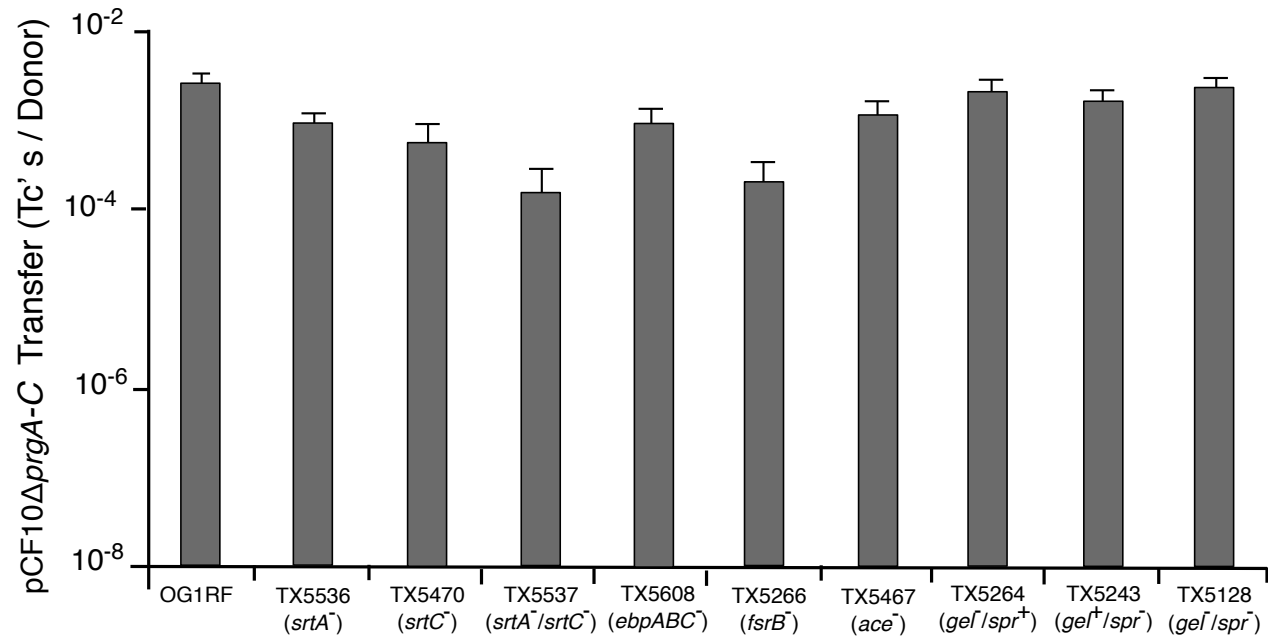

**Fig. S1. Contributions of chromosomally-encoded surface proteins to transfer of pCF10ΔprgA-C.** Transfer frequencies of pCF10ΔprgA-C in OG1RF mutant backgrounds in a 2 h liquid mating. Transfer frequencies are presented as the number of transconjugants per donor cell (Tc's/Donor). Experiments were repeated at least 3 times and the histogram depicts average values with standard deviations.

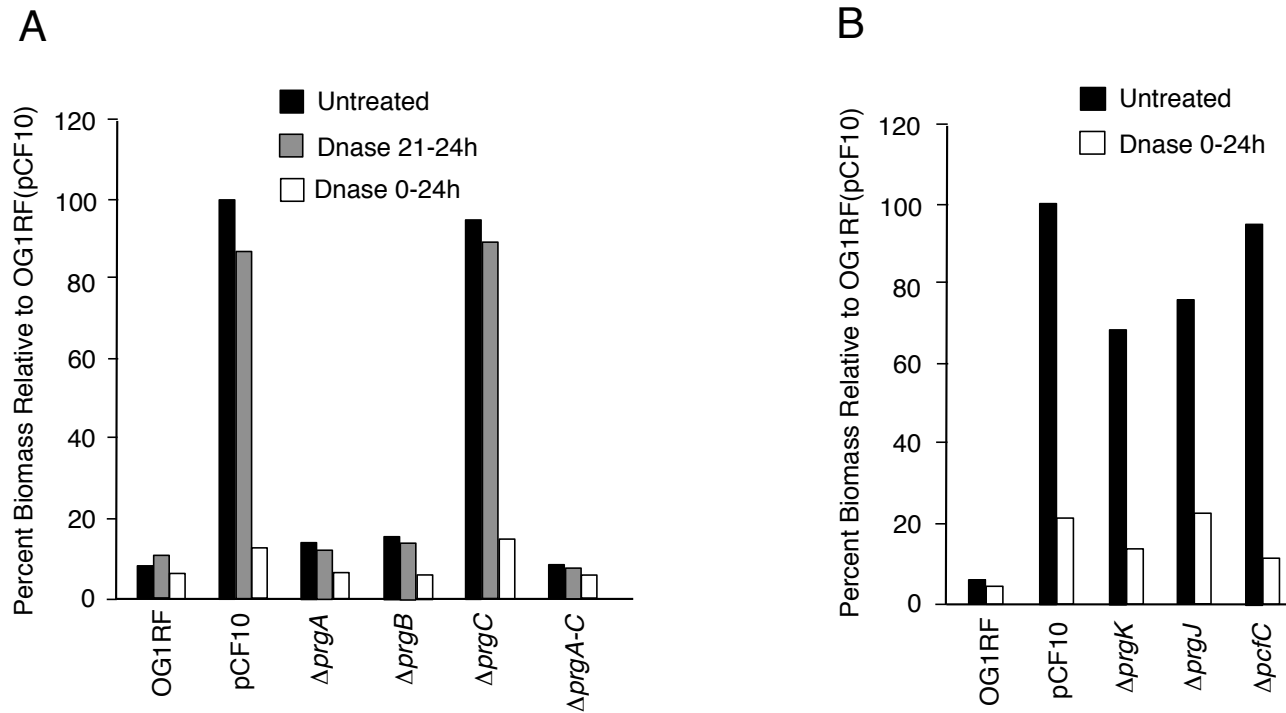

**Fig. S2. Effects of DNase treatment on biofilm development by *prgA*, *prgB*, *prgC* and T4SS gene deletion strains.** Biofilm formation by (A) *prgA*, *prgB*, *prgC* mutants or (B) T4SS mutants on polystyrene microtiter plates in the absence or presence of DNase. DNase was added either at the onset of biofilm growth and the cells were allowed to develop for 24 h (DNase 0 - 24 h) or at 21 h after which biofilms development was continued for an additional 3 h (DNase 21 - 24 h). The biofilm biomass was assayed as a function of the crystal violet stain retained. Results are expressed as the percentage biomass relative to strain OG1RF(pCF10). OG1RF, plasmid free parental strain.



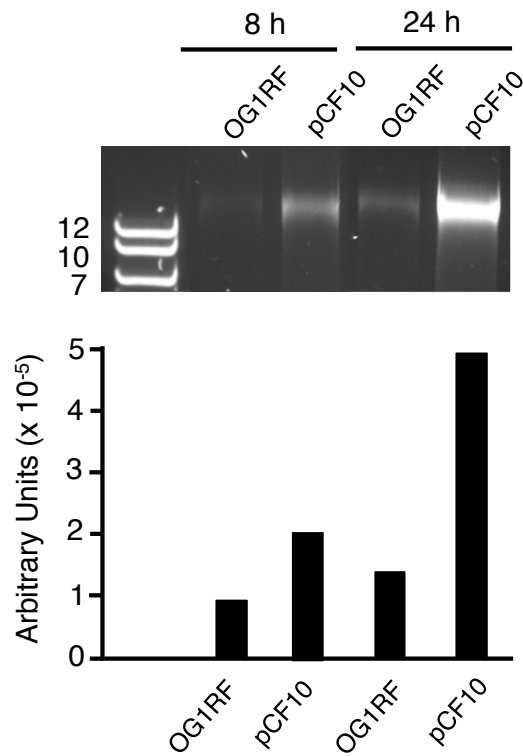

**FIG. S3. Contribution of pCF10 to eDNA accumulation during biofilm development.** High molecular weight bacterial chromosomal DNA was detected by ethidium bromide staining, after 20-fold concentration of supernatant fractions recovered from resuspended biofilms. Upper: stained gel showing relative amounts of eDNA recovered from OG1RF and OG1RF(pCF10) biofilms grown for 8- and 24-h following pheromone induction. The first lane contains the DNA ladder; sizes (kb) are shown on the left. Lower: Quantification of the eDNA in the upper gel after densitometric analysis and normalization per CFU.

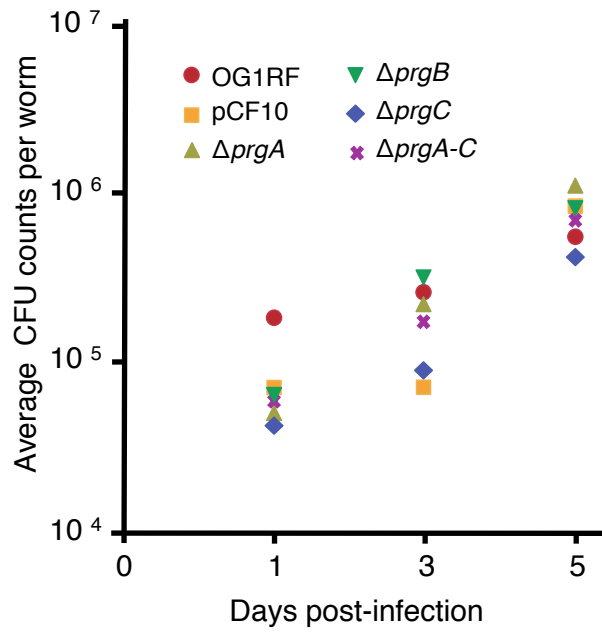

**FIG. S4 Proliferation of *prg* mutant strains in the worm.** Average colony forming units (CFU) per worm for *E. faecalis* OG1RF without or with pCF10 or  $\Delta prg$  mutant plasmids quantitated at 1, 3 and 5 days post-infection.

**Table S1. Quantitation of Biofilm Images**

| Strain/<br>Relevant<br>construct | Biofilm<br>Thickness ( $\mu\text{M}$ ) |      | Total Fluorescence Intensity As a Percent of OG1RF(pCF10) |     |      |                |     |      |
|----------------------------------|----------------------------------------|------|-----------------------------------------------------------|-----|------|----------------|-----|------|
|                                  | 8 h                                    | 24 h | 8 hr biofilms                                             |     |      | 24 hr biofilms |     |      |
|                                  |                                        |      | Cells                                                     | EPS | eDNA | Cells          | EPS | eDNA |
| OG1RF                            | 7                                      | 8    | 21                                                        | 22  | 19   | 30             | 7   | 32   |
| ( $P_Q::prgA-C$ )                | 11                                     | 20   | 53                                                        | 14  | 45   | 72             | 20  | 55   |
| pCF10                            | 14                                     | 21   | 100                                                       | 100 | 100  | 100            | 100 | 100  |
|                                  | 48 h                                   |      | 48 hr biofilms                                            |     |      |                |     |      |
|                                  |                                        |      | Total DNA                                                 | EPS |      |                |     |      |
| OG1RF                            | 10                                     |      | 31                                                        | 21  |      |                |     |      |
| ( $P_Q::prgA-C$ )                | 26                                     |      | 67                                                        | 81  |      |                |     |      |
| pCF10                            | 31                                     |      | 100                                                       | 100 |      |                |     |      |
| $\Delta prgA$                    | 8                                      |      | 25                                                        | 18  |      |                |     |      |
| $\Delta prgB$                    | 7                                      |      | 25                                                        | 24  |      |                |     |      |
| $\Delta prgC$                    | 33                                     |      | 71                                                        | 84  |      |                |     |      |
| $\Delta prgA-C$                  | 6                                      |      | 12                                                        | 17  |      |                |     |      |

Table S1. For each channel of the biofilm images (Fig. 5, 6) acquired with the Olympus IX 81 fluorescence microscope, total fluorescence intensity (FI) was calculated using Slidebook (version 6) software (see Materials and Methods) and presented as a percentage of the value for OR1RF(pCF10) biofilms in the same experiment. The values listed for eDNA also reflect any DNA associated with lysed cells. The thickness of each biofilm was directly determined using the Slidebook software as the number of  $1 \mu\text{M}$  slices collected.
